# Supplementary material for: MALINC1 an Immune-Related Long Non-Coding RNA Associated with Early-Stage Breast Cancer Progression
Source: MDPI journal article supplement (doi:10.3390/cancers14122819), 2022-06-07
Supplement: s1 [file s1]

**Table S3. List of primers used in RT-qPCR analysis**

| <b>Transcript</b> | <b>Primer sequence</b>                                            | <b>Amplicon</b> |
|-------------------|-------------------------------------------------------------------|-----------------|
| <i>MALINC1</i>    | Fw5´-CTACTTGGCTTCTTTCCTGGC-3´<br>Rv5´-TCCACTCTTTGGAAAAGCCCA-3´    | 187 bp          |
| <i>MALAT1</i>     | Fw5´-CACCGAAGGCTTAAAGTAGGAC-3´<br>Rv5´-GCTGACACTTCTCTTGACCTTAG-3´ | 93 bp           |
| <i>MTRNR1</i>     | Fw5´-ACACATGCAAGCATCCC-3´<br>Rv5´-GGCTGGCACGAAATTGA-3´            | 205 bp          |
| <i>JUN</i>        | Fw5´-CACAGAGAGACAGACTTGAGAAC-3´<br>Rv5´-ACTTGGATACCCTTGGCTTTAG-3´ | 86 bp           |
| <i>FOS</i>        | Fw5´-GAAGACCGAGCCCTTTGAT-3´<br>Rv5´-CTGCATAGAAGGACCCAGATA-3´      | 110 bp          |
| <i>RNA18S</i>     | Fw5´-GTAACCCGTTGAACCCCAT-3´<br>Rv5´-CCATCCAATCGGTAGTAGCG-3´       | 151 bp          |
| <i>GAPDH</i>      | Fw5´-ACAACTTTGGTATCGTGGAAGG-3´<br>Rv5´-GCCATCACGCCACAGTTTC-3´     | 294 bp          |
